# Supplementary material for: Prequential AUC: properties of the area under the ROC curve for data streams with concept drift
Source: Springer Nature journal article supplement (doi:10.1007/s10115-017-1022-8), 2017-01-16
Supplement: MOESM1 [file 12001814]

## A Degree of Indifference

Table S1: Degree of indifference with batch-calculated AUC for balanced datasets (50% both classes)

| $n$ | $d$ | $A(a) = A(b)$<br>$pA(a) = pA(b)$<br>$a \neq b$ | $a \neq b$      | $\mathbf{E}$ | $n$   | $d$ | $A(a) = A(b)$<br>$bA(a) = bA(b)$<br>$a \neq b$ | $a \neq b$      | $\mathbf{E}$ |       |
|-----|-----|------------------------------------------------|-----------------|--------------|-------|-----|------------------------------------------------|-----------------|--------------|-------|
| 4   | 2   |                                                | 8               | 360          | 0.022 | 4   | 2                                              | 24              | 360          | 0.067 |
| 4   | 3   |                                                | 8               | 360          | 0.022 | 4   | 3                                              | 14              | 360          | 0.039 |
| 6   | 2   | 3,080                                          | 136,800         | 0.023        | 6     | 2   | 5,598                                          | 136,800         | 0.041        |       |
| 6   | 3   | 1,992                                          | 136,800         | 0.015        | 6     | 3   | 4,874                                          | 136,800         | 0.036        |       |
| 6   | 4   | 774                                            | 136,800         | 0.006        | 6     | 4   | 1,846                                          | 136,800         | 0.013        |       |
| 6   | 5   | 2,016                                          | 136,800         | 0.015        | 6     | 5   | 4,632                                          | 136,800         | 0.034        |       |
| 8   | 2   | 1,744,596                                      | 97,372,800      | 0.018        | 8     | 2   | 3,040,650                                      | 97,372,800      | 0.031        |       |
| 8   | 3   | 977,371                                        | 97,372,800      | 0.010        | 8     | 3   | 2,130,899                                      | 97,372,800      | 0.022        |       |
| 8   | 4   | 515,962                                        | 97,372,800      | 0.005        | 8     | 4   | 2,417,558                                      | 97,372,800      | 0.025        |       |
| 8   | 5   | 673,976                                        | 97,372,800      | 0.007        | 8     | 5   | 1,369,228                                      | 97,372,800      | 0.014        |       |
| 8   | 6   | 725,592                                        | 97,372,800      | 0.007        | 8     | 6   | 1,538,064                                      | 97,372,800      | 0.016        |       |
| 8   | 7   | 1,767,600                                      | 97,372,800      | 0.018        | 8     | 7   | 3,033,360                                      | 97,372,800      | 0.031        |       |
| 10  | 2   | 1,525,432,958                                  | 114,764,428,800 | 0.013        | 10    | 2   | 2,737,795,920                                  | 114,764,428,800 | 0.024        |       |
| 10  | 3   | 794,657,105                                    | 114,764,428,800 | 0.007        | 10    | 3   | 2,083,703,623                                  | 114,764,428,800 | 0.018        |       |
| 10  | 4   | 413,306,776                                    | 114,764,428,800 | 0.004        | 10    | 4   | 890,459,873                                    | 114,764,428,800 | 0.008        |       |
| 10  | 5   | 604,079,698                                    | 114,764,428,800 | 0.005        | 10    | 5   | 2,285,218,882                                  | 114,764,428,800 | 0.020        |       |
| 10  | 6   | 156,220,714                                    | 114,764,428,800 | 0.001        | 10    | 6   | 409,224,780                                    | 114,764,428,800 | 0.004        |       |
| 10  | 7   | 624,415,704                                    | 114,764,428,800 | 0.005        | 10    | 7   | 1,090,506,552                                  | 114,764,428,800 | 0.010        |       |
| 10  | 8   | 902,736,000                                    | 114,764,428,800 | 0.008        | 10    | 8   | 1,641,371,760                                  | 114,764,428,800 | 0.014        |       |
| 10  | 9   | 1,999,589,760                                  | 114,764,428,800 | 0.017        | 10    | 9   | 3,127,178,880                                  | 114,764,428,800 | 0.027        |       |

Table S2: Degree of Indifference with Batch-calculated AUC for Imbalanced Datasets (34% Minority Class)

| $n$ | $d$ | $A(a) = A(b)$<br>$pA(a) = pA(b)$<br>$a \neq b$ | $a \neq b$     | $\mathbf{E}$ | $n$   | $d$ | $A(a) = A(b)$<br>$bA(a) = bA(b)$<br>$a \neq b$ | $a \neq b$     | $\mathbf{E}$ |       |
|-----|-----|------------------------------------------------|----------------|--------------|-------|-----|------------------------------------------------|----------------|--------------|-------|
| 4   | 2   |                                                | 0              | 144          | 0.000 | 4   | 2                                              | 0              | 144          | 0.000 |
| 4   | 3   |                                                | 0              | 144          | 0.000 | 4   | 3                                              | 0              | 144          | 0.000 |
| 6   | 2   | 1,646                                          | 75,600         | 0.022        | 6     | 2   | 2,662                                          | 75,600         | 0.035        |       |
| 6   | 3   | 820                                            | 75,600         | 0.011        | 6     | 3   | 3,030                                          | 75,600         | 0.040        |       |
| 6   | 4   | 332                                            | 75,600         | 0.004        | 6     | 4   | 850                                            | 75,600         | 0.011        |       |
| 6   | 5   | 912                                            | 75,600         | 0.012        | 6     | 5   | 2,160                                          | 75,600         | 0.029        |       |
| 8   | 2   | 1,129,840                                      | 62,092,800     | 0.018        | 8     | 2   | 1,894,042                                      | 62,092,800     | 0.031        |       |
| 8   | 3   | 593,032                                        | 62,092,800     | 0.010        | 8     | 3   | 1,474,905                                      | 62,092,800     | 0.024        |       |
| 8   | 4   | 275,590                                        | 62,092,800     | 0.004        | 8     | 4   | 507,094                                        | 62,092,800     | 0.008        |       |
| 8   | 5   | 302,360                                        | 62,092,800     | 0.005        | 8     | 5   | 727,836                                        | 62,092,800     | 0.012        |       |
| 8   | 6   | 365,544                                        | 62,092,800     | 0.006        | 8     | 6   | 855,432                                        | 62,092,800     | 0.014        |       |
| 8   | 7   | 989,280                                        | 62,092,800     | 0.016        | 8     | 7   | 1,772,640                                      | 62,092,800     | 0.029        |       |
| 10  | 2   | 385,937,128                                    | 25,909,632,000 | 0.015        | 10    | 2   | 660,637,460                                    | 25,909,632,000 | 0.025        |       |
| 10  | 3   | 191,406,275                                    | 25,909,632,000 | 0.007        | 10    | 3   | 517,685,937                                    | 25,909,632,000 | 0.020        |       |
| 10  | 4   | 66,782,808                                     | 25,909,632,000 | 0.003        | 10    | 4   | 168,622,680                                    | 25,909,632,000 | 0.007        |       |
| 10  | 5   | 115,821,229                                    | 25,909,632,000 | 0.004        | 10    | 5   | 230,520,555                                    | 25,909,632,000 | 0.009        |       |
| 10  | 6   | 79,156,614                                     | 25,909,632,000 | 0.003        | 10    | 6   | 14,018,286                                     | 25,909,632,000 | 0.001        |       |
| 10  | 7   | 47,304,552                                     | 25,909,632,000 | 0.002        | 10    | 7   | 168,801,216                                    | 25,909,632,000 | 0.007        |       |
| 10  | 8   | 196,931,520                                    | 25,909,632,000 | 0.008        | 10    | 8   | 387,977,040                                    | 25,909,632,000 | 0.015        |       |
| 10  | 9   | 457,390,080                                    | 25,909,632,000 | 0.018        | 10    | 9   | 716,728,320                                    | 25,909,632,000 | 0.028        |       |

Table S3: Degree of Indifference with Batch-calculated AUC for Imbalanced Datasets (14% Minority Class)

| $n$ | $d$ | $A(a) = A(b)$<br>$pA(a) = pA(b)$<br>$a \neq b$ | $a \neq b$  | $\mathbf{E}$ | $n$ | $d$ | $A(a) = A(b)$<br>$bA(a) = bA(b)$<br>$a \neq b$ | $a \neq b$  | $\mathbf{E}$ |
|-----|-----|------------------------------------------------|-------------|--------------|-----|-----|------------------------------------------------|-------------|--------------|
| 4   | 2   | 0                                              | 144         | 0            | 4   | 2   | 0                                              | 144         | 0            |
| 4   | 3   | 0                                              | 144         | 0            | 4   | 3   | 0                                              | 144         | 0            |
| 6   | 2   | 0                                              | 10,800      | 0            | 6   | 2   | 0                                              | 10,800      | 0            |
| 6   | 3   | 0                                              | 10,800      | 0            | 6   | 3   | 0                                              | 10,800      | 0            |
| 6   | 4   | 0                                              | 10,800      | 0            | 6   | 4   | 0                                              | 10,800      | 0            |
| 6   | 5   | 0                                              | 10,800      | 0            | 6   | 5   | 0                                              | 10,800      | 0            |
| 8   | 2   | 0                                              | 1,128,960   | 0            | 8   | 2   | 0                                              | 1,128,960   | 0            |
| 8   | 3   | 0                                              | 1,128,960   | 0            | 8   | 3   | 0                                              | 1,128,960   | 0            |
| 8   | 4   | 0                                              | 1,128,960   | 0            | 8   | 4   | 0                                              | 1,128,960   | 0            |
| 8   | 5   | 0                                              | 1,128,960   | 0            | 8   | 5   | 0                                              | 1,128,960   | 0            |
| 8   | 6   | 0                                              | 1,128,960   | 0            | 8   | 6   | 0                                              | 1,128,960   | 0            |
| 8   | 7   | 0                                              | 1,128,960   | 0            | 8   | 7   | 0                                              | 1,128,960   | 0            |
| 10  | 2   | 0                                              | 163,296,000 | 0            | 10  | 2   | 0                                              | 163,296,000 | 0            |
| 10  | 3   | 0                                              | 163,296,000 | 0            | 10  | 3   | 0                                              | 163,296,000 | 0            |
| 10  | 4   | 0                                              | 163,296,000 | 0            | 10  | 4   | 0                                              | 163,296,000 | 0            |
| 10  | 5   | 0                                              | 163,296,000 | 0            | 10  | 5   | 0                                              | 163,296,000 | 0            |
| 10  | 6   | 0                                              | 163,296,000 | 0            | 10  | 6   | 0                                              | 163,296,000 | 0            |
| 10  | 7   | 0                                              | 163,296,000 | 0            | 10  | 7   | 0                                              | 163,296,000 | 0            |
| 10  | 8   | 0                                              | 163,296,000 | 0            | 10  | 8   | 0                                              | 163,296,000 | 0            |
| 10  | 9   | 0                                              | 163,296,000 | 0            | 10  | 9   | 0                                              | 163,296,000 | 0            |

## B Additional Figures

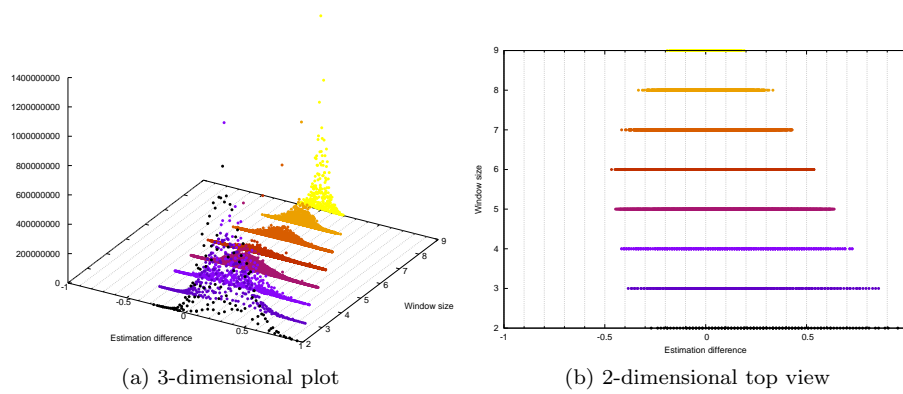

Fig. S1: Differences between prequential and batch AUC for different window sizes on the largest dataset with medium class imbalance (34% minority class examples)

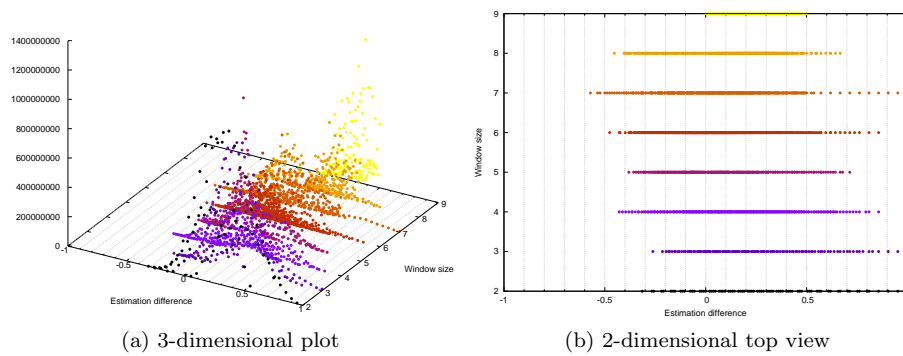

Fig. S2: Differences between block and batch AUC for different window sizes on the largest dataset with medium class imbalance (34% minority class examples)

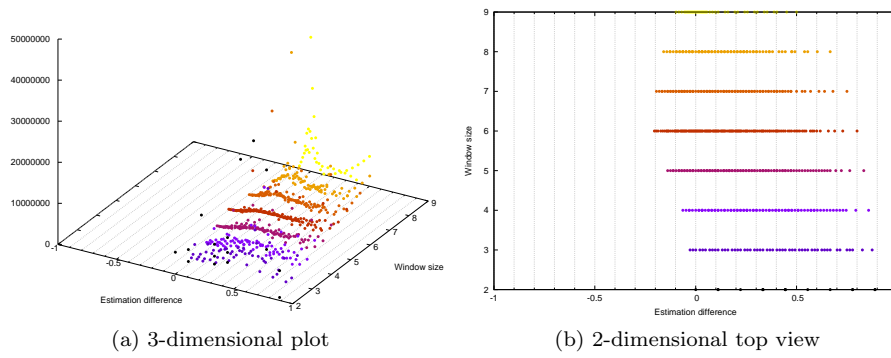

Fig. S3: Differences between prequential and batch AUC for different window sizes on the largest dataset with high class imbalance (14% minority class examples)

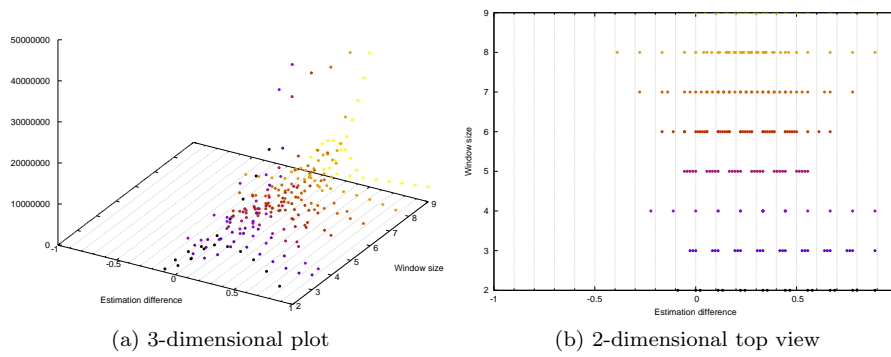

Fig. S4: Differences between block and batch AUC for different window sizes on the largest dataset with high class imbalance (14% minority class examples)

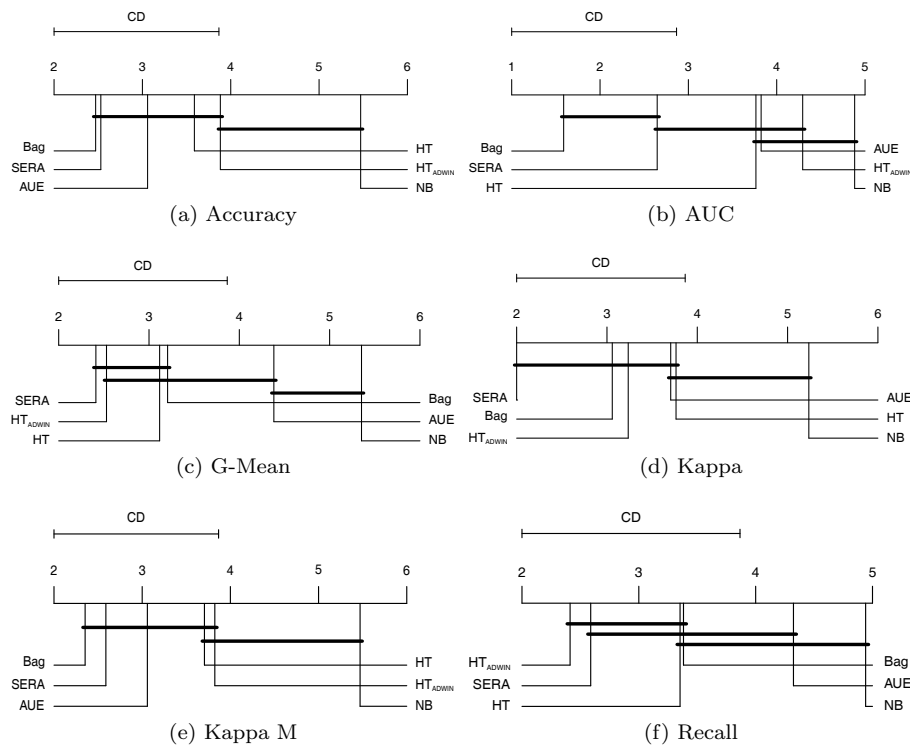

Fig. S5: Comparison of all classifiers with the Nemenyi test (the lower the rank the better). Groups of classifiers that are not significantly different (at  $\alpha = 0.05$ ) are connected.
